# Supplementary material for: Preparation of a lignin-based vitrimer material and its potential use for recoverable adhesives
Source: Royal Society of Chemistry journal article supplement (doi:10.1039/c8gc01299g), 2018-01-01
Supplement: c8gc01299g1.pdf [file c8gc01299g1.pdf]

## Supporting information

### Preparation of a Lignin-based Vitrimer Material and Its Potential Use for Recoverable Adhesive

Shuai Zhang,<sup>‡a,b</sup> Tuan Liu,<sup>‡a</sup> Cheng Hao,<sup>a</sup> Liwei Wang,<sup>a</sup> Jiarui Han,<sup>a,c</sup> Hang Liu<sup>\*b</sup> and Jinwen Zhang<sup>\*a</sup>

<sup>a</sup> School of Mechanical and Materials Engineering, Composite Materials and Engineering Center, Washington State University, Pullman, Washington 99164, United States.

<sup>b</sup> Department of Apparel, Merchandizing, Design and Textiles, Washington State University, Pullman, Washington 99164, United States.

<sup>c</sup> Key Laboratory of Advanced Materials of Ministry of Education, Department of Chemical Engineering, Tsinghua University, Beijing, 100084, China.

<sup>‡</sup> Shuai Zhang and Tuan Liu contributed equally to this article.

Corresponding authors: [jwzhang@wsu.edu](mailto:jwzhang@wsu.edu) (J.Z.) and [hangliu@wsu.edu](mailto:hangliu@wsu.edu) (H.L)

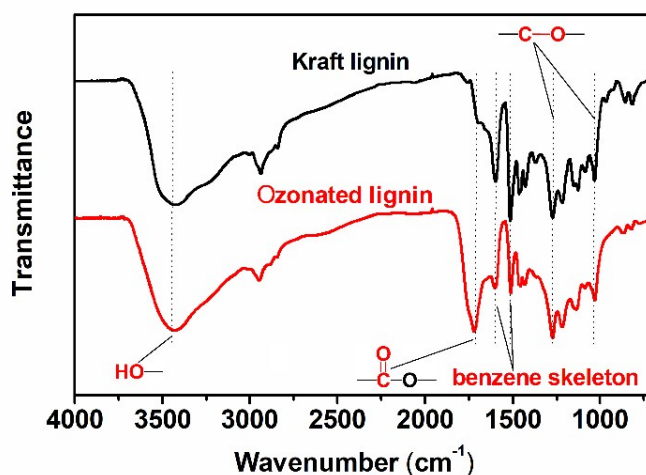

**Fig. S1** FTIR spectra of Kraft lignin and ozonated lignin (Oz-L).

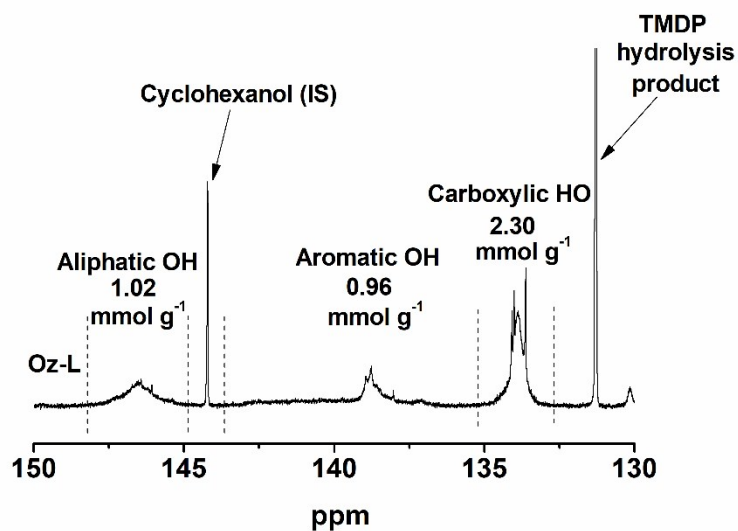

**Fig. S2**  $^{31}\text{P}$ -NMR spectra of Oz-L.

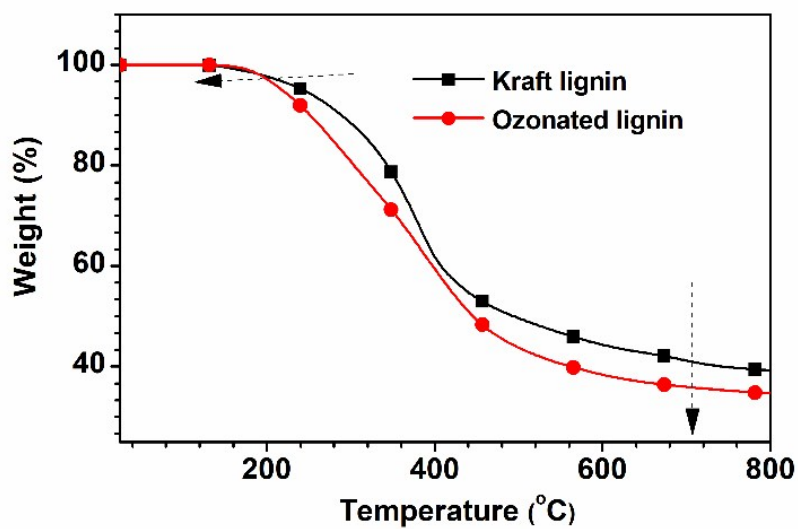

**Fig. S3** TGA curves of Kraft lignin and Oz-L.

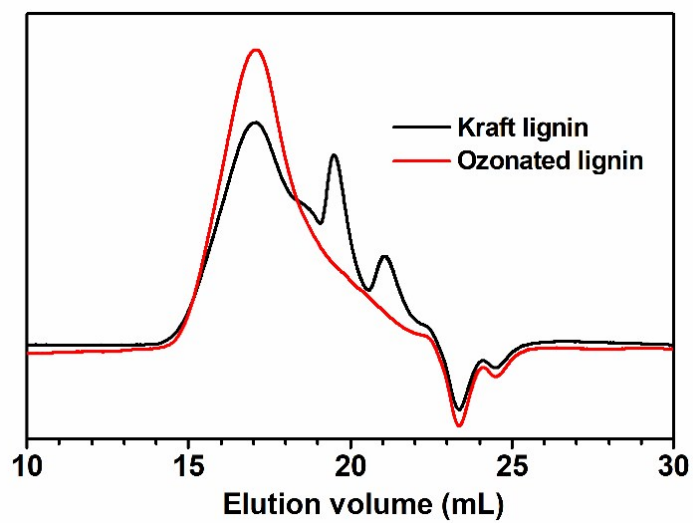

**Fig. S4** GPC curves of Kraft lignin and Oz-L.

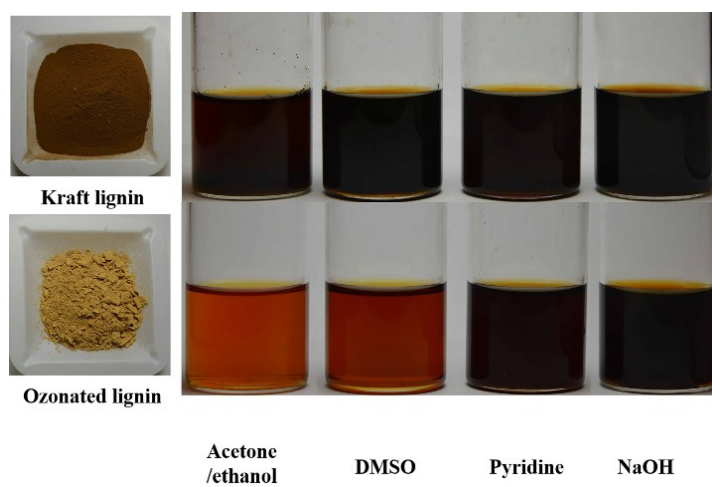

**Fig. S5** Dissolution tests of Kraft lignin and Oz-L in acetone/ethanol (1:1, v/v), DMSO, pyridine and 2% NaOH.

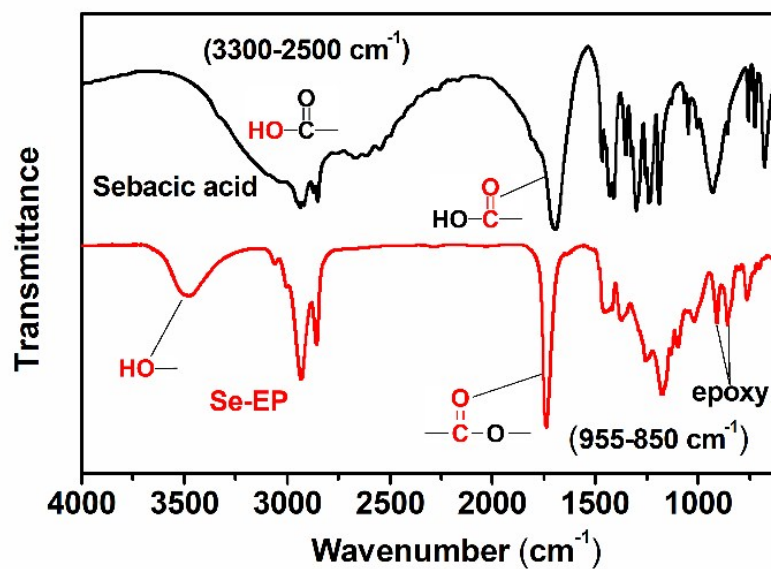

**Fig. S6** FTIR spectra of sebacic acid (Se) and its epoxide (Se-EP).

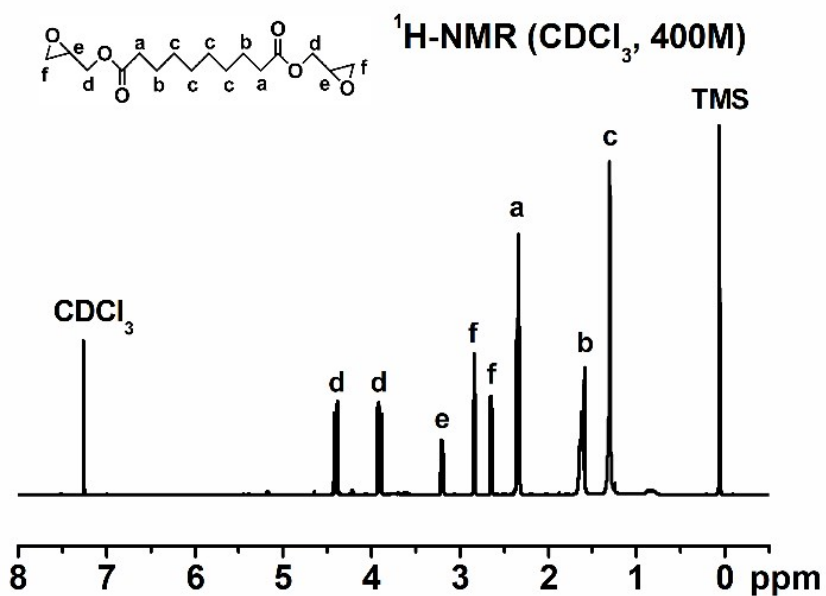

**Fig. S7** <sup>1</sup>H-NMR spectrum of Se-EP.

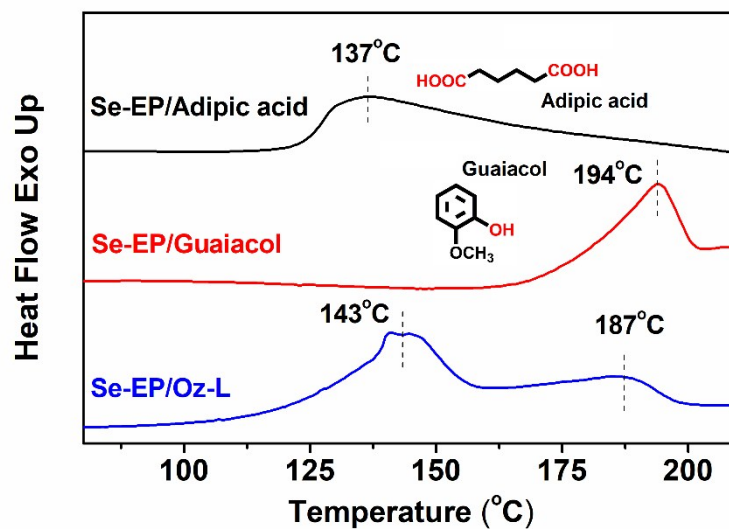

**Fig. S8** DSC non-isothermal thermograms of Se-EP/adipic acid, Se-EP/guaiacol and Se-EP/Oz-L (R=1:1) were scanned at a heating rate of 5 °C min<sup>-1</sup> under nitrogen atmosphere.

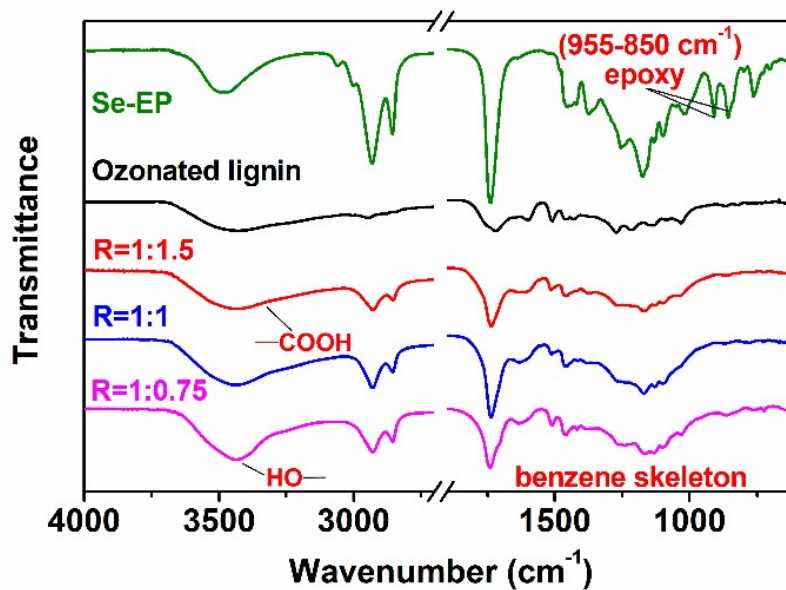

**Fig. S9** FTIR spectra of the cured Se-EP/Oz-Ls with different stoichiometry ratios (R). R is based on ratio of epoxy versus the sum of phenolic OH and carboxylic acid groups.

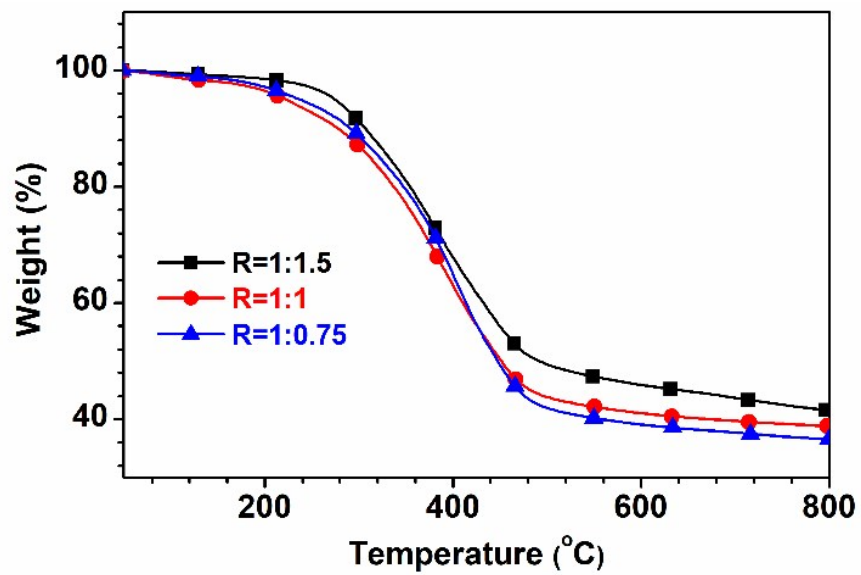

**Fig. S10** TGA curves of the cured Se-EP/Oz-Ls with different R ratios.

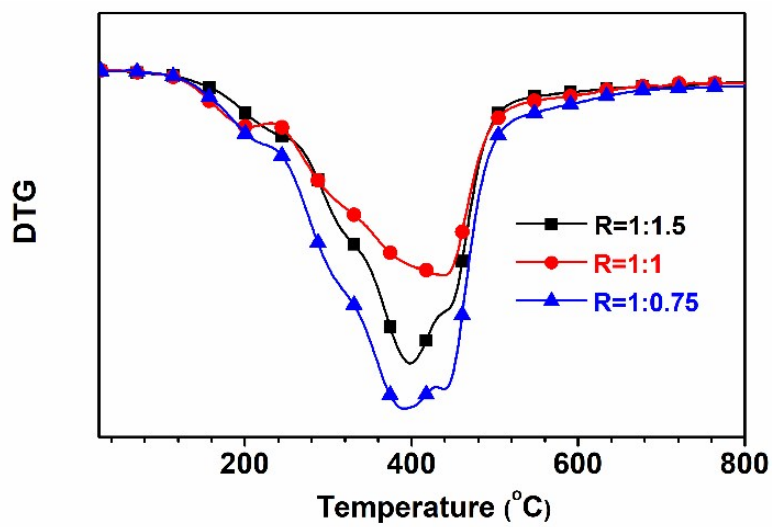

**Fig. S11** DTG curves of the cured Se-EP/Oz-Ls with different R ratios from TGA test.

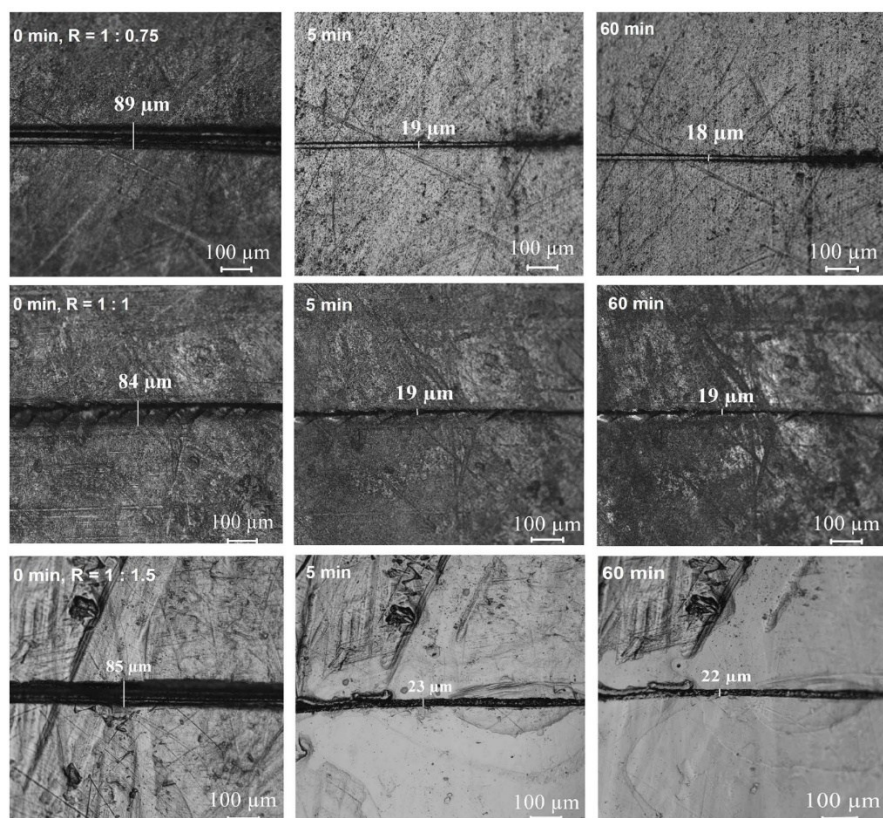

**Fig. S12** Thermal repairing of Se-EP/Oz-Ls with  $R = 1:0.75$ ,  $1:1$  and  $1:1.5$ . The width of scratches versus time is recorded at the same position for each sample.

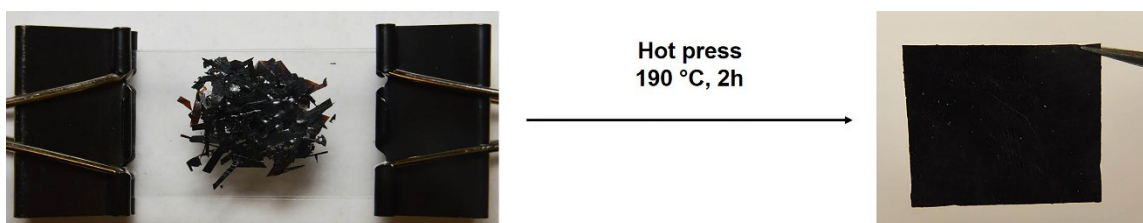

**Fig. S13** Physical recycling of the cured Se-EP/Oz-Ls ( $R = 1:1$ ). The fragments were pressed at  $190\text{ }^{\circ}\text{C}$  for 2 h.

**Table S1.** The summary of shape fixity ( $R_f$ ) and shape recovery ( $R_r$ ) for the cured Se-EP/Oz-Ls in each cycle.

| $R^a$  | $R_f^b$ (%) |         |         | $R_r^c$ (%) |         |         |
|--------|-------------|---------|---------|-------------|---------|---------|
|        | Cycle 1     | Cycle 2 | Cycle 3 | Cycle 1     | Cycle 2 | Cycle 3 |
| 1:0.75 | 91.81       | 92.25   | 92.30   | 97.28       | 97.12   | 96.88   |
| 1:1    | 93.49       | 93.65   | 94.64   | 95.44       | 95.05   | 93.60   |
| 1:1.5  | 93.19       | 93.29   | 95.07   | 91.10       | 86.72   | 83.59   |

<sup>a</sup>R represents the ratio of epoxy versus the sum of phenolic OH and carboxylic acid groups; <sup>b</sup> $R_f$  represents the shape fixity; <sup>c</sup>  $R_r$  represents the shape recovery.

## EXPERIMENTAL SECTION

### Materials

Sebacic acid (Acros Organics, 98%), zinc acetylacetonate hydrate ( $\text{Zn}(\text{acac})_2$ , Aldrich, 99.995%), tetra-n-butylammonium bromide (TBAB, TCI, 98%), Kraft lignin (Ingevity), potassium carbonate (Fisher, 99.8%), potassium iodide (J.T. Baker, 99%), allyl bromide (Acros Organics, 99%), pyridine (Aldrich, anhydrous, 99.8%), chloroform-d (Aldrich, 99.8% atom D), cyclohexanol (Aldrich, 99%), chromium acetylacetonate (Aldrich, 99.99%), 2-Chloro-4,4,5,5-tetramethyl-1,3,2-dioxaphospholane (TMDP, Aldrich, 95%) and phenolphthalein indicator (BICCA) were used as received. Bio-epichlorohydrin (bio-ECH) was supplied by Advanced Biochemical (Thailand) Co., Ltd. All the solvents (GR grade) were used without further purification.

### Kraft lignin ozonolysis and characterization

Ozonolysis of Kraft lignin was performed based on Lee et al.<sup>1</sup> and Bule et al.<sup>2</sup> with a slight modification. Under magnetic stirring, Kraft lignin (8 g) was dissolved in 1,4-dioxane/water solution (9:1, 400 mL). Ozone was generated by a L11-L24 ozone



generator (Pacific Ozone, California). The ozonation reaction was carried out with ozone (5.3%, w/w) at a flow rate of 1 L min<sup>-1</sup> for 60 min in a 600 mL glass column reactor. After ozonation, the soluble segments were obtained by vacuum filtration, and the solvents were removed and recycled using a rotary evaporator. The resulting crude product was washed twice by water. The purified ozonized lignin was dried in a vacuum oven at 50 °C for 48 h.

### **Synthesis of sebacic acid-derived epoxy (Se-EP)**

Sebacic acid (10 g, 1 *equiv.*) and TBAB (0.05 *equiv.*) were dissolved in epichlorohydrin (20 *equiv.*) in a 500 mL round bottom flask. The reaction was performed at 117 °C for 3 h with a reflux under magnetic stirring. After the reaction temperature was cooled down to 50 °C, a 30% NaOH (1.1 *equiv.*) aqueous solution was added dropwise into the mixture within 4 h. The resulting solution was further reacted at 50 °C for 2 h. After reaction, the solution was washed with hot water to remove the salts. The organic phase was collected, and the solvent (ECH) was removed and recycled using a rotary evaporator. The concentrated mixture was dried in a vacuum oven at 70 °C. The received product, diglycidyl sebacate, was directly used for curing without further purification. <sup>1</sup>H-NMR (400 MHz, CDCl<sub>3</sub>, ppm): 4.42 (dd, 2H), 3.91 (dd, 2H), 3.19-3.23 (m, 2H), 2.85 (t, 2H), 2.65 (dd, 2H), 2.35 (t, 4H), 1.60-1.65 (m, 4H), 1.25-1.31 (m, 8H).

### **Preparation of Se-EP/ozonated lignin vitrimer**

The cured Se-EP/Oz-L materials were prepared with different R ratios. R is the stoichiometry ratio of epoxy versus the sum of phenolic OH and carboxylic acid groups. Zn(acac)<sub>2</sub> was used as catalyst at an amount of 10 mol% on the basis of active hydrogen groups (both COOH and phenolic OH) in Oz-L. A small amount of ethanol was used to

assist the mixing of the three components, and the solvent was removed in a vacuum oven at 50 °C after the mixture was loaded on a Teflon sheet. Curing reaction was carried out at 150 °C for 1 h and 190 °C for 2 h in a hot press.

### **Characterizations**

The molecular weight of Kraft lignin and Oz-L were measured using a Viscotek gel permeation chromatography (GPC) system equipped with a GPCmax™ pulp and a TDA 305 multi-detector. The columns used for GPC separation were two AM GPC gel columns (500 Å, 5 µm) in series. Tetrahydrofuran (THF) was used as eluent. To improve the solubility of sample in THF, all lignin samples were modified by allyl bromide following a method in the literature.<sup>3</sup>

Fourier transform infrared spectroscopy (FTIR) analysis was performed on NICOLET iS50 FTIR spectrophotometer. The sample was scanned for 64 times from 4000 to 400 cm<sup>-1</sup> with a resolution of 4.0 cm<sup>-1</sup>. Nuclear magnetic resonance (NMR) analysis was carried out on a Varian 400-NMR spectrometer (400 MHz). CDCl<sub>3</sub> was used as deuterated solvent for dissolving the samples.

The epoxy equivalent weight (EEW, mol/100 g) of Se-EP was determined by titration following a hydrochloric acid (HCl)-acetone method. The HCl-acetone solution was prepared by adding 2 mL HCl solution (37%, wt/wt) into 80 mL acetone solution. A sample of ~ 0.2 g (accurate to 0.0002 g) was reacted with 10 mL HCl-acetone solution in darkness for 30 min at room temperature. Then, 3-5 drops of phenolphthalein indicator were added into flask, and the solution was titrated with a ~0.15 N NaOH ( $C_{\text{NaOH}}$ ) standard solution. Until the color of solution was changed to light pink color and did not

fade within 30 s, the consumption volume of NaOH standard solution was recorded as  $V_1$ .

The epoxy equivalent weight of Se-EP was calculated as the following equation,

$$EEW = \frac{(V_0 - V_1) \times C_{NaOH}}{10W}$$

$V_0$  represents the consumption volume of NaOH standard solution in blank;  $V_1$  represents the consumption volume of NaOH standard solution in experiment section;  $W$  represents the weight of sample.

The amount of active hydrogen groups (carboxylic acid and phenolic hydroxyl groups) was titrated according to the following method. The dry ozonated lignin of  $\sim 0.2$  g (accurate to 0.0002 g) reacted with 25 mL  $\sim 0.1$  N NaOH standard solution in a 100 mL flask in darkness for 30 min at room temperature. The solution was titrated with a  $\sim 0.1$  N HCl standard solution. The pH value was monitored by a pH meter. Until the pH value turn to  $\sim 7.0$ , the consumption volume of HCl standard solution was recorded.

The amount of phenolic and carboxylic acid groups in Oz-L was determined by  $^{31}\text{P}$ -NMR based on the method of Granata et al<sup>4</sup> with a slight modification. The dried Oz-L of  $\sim 20$  mg (accurate to 0.1 mg) was dissolved into 550  $\mu\text{L}$  of a mixture solvent of pyridine and deuterated chloroform (1.6:1, v/v) containing cyclohexanol (internal standard, 0.11%, w/v) and chromium acetylacetonate (relaxation agent, 0.098%, w/v) in a 1 mL vial. The TMDP (70  $\mu\text{L}$ ) was then added into the vial. The vial was shaken for  $\sim 20$  s to achieve the complete phosphitylating reaction. The  $^{31}\text{P}$ -NMR spectrum was measured on a NMR spectrometer (600 MHz). Samples were scanned for 64 times with a 25 s delay between  $90^\circ$  pulses.

Differential scanning calorimeter was used to distinguish the relative reactivity of phenolic and carboxylic acid groups in Oz-L. The samples (~5 mg) were scanned from -20 to 220 °C at a heat rate of 5 K min<sup>-1</sup> under nitrogen atmosphere.

Thermal stability was determined using a TGA/DSC1 thermo-gravimetric analyzer (TGA). A sample of ~10 mg was loaded into a ceramic crucible and scanned from 25 to 800 °C at a heating rate of 10 K min<sup>-1</sup> under nitrogen atmosphere.

Dynamic mechanical properties were measured using a dynamic mechanical analyzer (DMA) (Q800, Thermal Instrument) in tension mode. The film with a dimension of 20 mm x 5 mm x 0.3 mm was scanned from -60 to 180 °C at the heating rate of 5 K min<sup>-1</sup>. The amplitude was set at 15µm, and the frequency was 1 Hz.

Tensile properties were measured on DMA in tension mode at room temperature. The strain rate was 0.5% min<sup>-1</sup>. The sample with a dimension of 20 mm x 5 mm x 0.3 mm was used for the test.

The swelling ratio of the cured Se-EP/Oz-Ls was measured by immersing the sample (~0.5 g,  $W_1$ ) in a mixture solvent of ethanol/acetone (1:1, v/v) at 50 °C. After the absorption of the sample for solvent reached equilibrium, the samples were removed from the solution. The excessive surface solvent was removed with a filter paper, and the swollen samples were weighted ( $W_2$ ). The swelling ratio was calculated according to the following equation,

$$\text{Swelling ratio (\%)} = \frac{W_2 - W_1}{W_1} \times 100\%$$

Gel content of the cured Se-EP/Oz-L was determined by the solvent extraction method.<sup>5</sup> The pre-weighted dry sample (~0.5 g,  $W_1$ ) was extracted in 100 mL mixture solvent of ethanol/acetone (1:1, v/v) for 48 h in a 500 mL round bottom flask equipped with a Soxhlet extractor. After extraction, the samples were dried in a vacuum oven at 50 °C for 24 h and weighted ( $W_2$ ). The gel content was calculated according to the following equation,

$$Gel\ content\ (\%) = \frac{W_1 - W_2}{W_1} \times 100\%$$

Shape memory property was characterized using a dynamic mechanical analyzer (DMA) (Q800, Thermal Instrument) in the single cantilever mode. The dimension of the sample was 20 mm x 5 mm x 0.3 mm. First, the sample was equilibrated at 80 °C (above  $T_g$ ) for 40 min. Subsequently, a constant force of 0.1 N was applied to the sample and the temperature was decreased to 10 °C (below  $T_g$ ) at a cooling rate of 5 K min<sup>-1</sup>. When the temperature reached to 10 °C, the constant force was removed, and the sample was heated back to 80 °C at a heating rate of 5 K min<sup>-1</sup>. These above steps were repeated for three times, and the displacements were recorded during the test.

Stress relaxation test was performed on a discovery HR-2 hybrid rheometer with 8 mm parallel plates. The film sample with uniform thickness was heated to the test temperature and equilibrated for 10 min. A constant axial force (2 N) was applied to the sample in order to keep a good touch of sample with parallel plates, and the relaxation modulus versus time under a constant strain of 1.5% was recorded.

Lap shear test was carried out on a universal testing machine (Instron 4466) according to the ISO 4587:2003 standard. Aluminum sheets (4215BC, 0.025Ga) with a dimension

of 100 mm x 25 mm x 1 mm were polished using 240-grit sand paper and then cleaned by soapy water, distilled water and 2-propanol successively. In the presence of zinc catalyst, Se-EP/Oz-L mixture (R = 1:1, adhesive loading of 208 g m<sup>-2</sup>) was sandwiched between the polished aluminum sheets with an overlapping area of 12.5 mm x 25 mm. The aluminum sheets were bonded by hot press with the same aforementioned curing conditions. The lap shear test was conducted with a constant cross head speed of 5 mm min<sup>-1</sup> at room temperature. At least five repeat tests were performed for each sample.

Creep test was conducted on DMA in the film tension mode. The bonded aluminum sheets (20 mm x 5 mm x 1 mm) were subjected to creepage at 190 °C for 20 min under a constant load of 2 MPa. The adhesive used for bonding the aluminum sheets was the Se-EP/Oz-L (R = 1:1, adhesive loading of 208 g m<sup>-2</sup>).

## Reference

- 1 B. Tomita and S. Hosoya, *Mokuzai Kogyo*, 1991, **46**, 412-417.
- 2 M. V. Bule, A. H. Gao, B. Hiscox and S. Chen, *Journal of agricultural and food chemistry*, 2013, **61**, 3916-3925.
- 3 J. Xin, P. Zhang, K. Huang and J. Zhang, *RSC Advances*, 2014, **4**, 8525-8532.
- 4 A. Granata and D. S. Argyropoulos, *Journal of Agricultural and Food Chemistry*, 1995, **43**, 1538-1544.

- 5 J. Dai, S. Ma, Y. Wu, L. Han, L. Zhang, J. Zhu and X. Liu, *Green Chemistry*, 2015, **17**, 2383-2392.
